# Supplementary material for: Metabolic engineering of the carotenoid biosynthetic pathway toward a specific and sensitive inorganic mercury biosensor
Source: Royal Society of Chemistry journal article supplement (doi:10.1039/d2ra06764a), 2022-01-01
Supplement: d2ra06764a1.pdf [file d2ra06764a1.pdf]

## Supplementary data

### Metabolic engineering of the carotenoid biosynthetic pathway toward a specific and sensitive inorganic mercury biosensor

Chang-ye Hui <sup>a</sup>, Shun-yu Hu <sup>b</sup>, Li-mei Li <sup>a</sup>, Jian-pei Yun <sup>c</sup>, Yan-fang Zhang <sup>c</sup>, Juan Yi

<sup>a</sup>, Nai-xing Zhang <sup>d,\*</sup>, Yan Guo <sup>d, b,\*</sup>

<sup>a</sup> Department of Pathology & Toxicology, Shenzhen Prevention and Treatment Center for Occupational Diseases, Shenzhen 518020, China

<sup>b</sup> Department of Toxicology, School of Public Health, Southern Medical University, Guangzhou, China.

<sup>c</sup> Physical & Chemical Testing Laboratory, Shenzhen Prevention and Treatment Center for Occupational Diseases, Shenzhen 518020, China

<sup>d</sup> National Key Clinical Specialty of Occupational Diseases, Shenzhen Prevention and Treatment Center for Occupational Diseases, Shenzhen 518020, China

#### \*Correspondence author

Nai-xing Zhang

zhanghealth@126.com

Yan Guo

yanguo615@163.com

**Table. S1** Bacterial strains and plasmids used in this study

| Strains and plasmids          | Genotypes or description                                                                                                                                                                                | Reference  |
|-------------------------------|---------------------------------------------------------------------------------------------------------------------------------------------------------------------------------------------------------|------------|
| <b><i>E. coli</i> strains</b> |                                                                                                                                                                                                         |            |
| TOP10                         | F <sup>-</sup> Φ80 <i>lacZ</i> ΔM15 Δ <i>lacX74 recA1</i>                                                                                                                                               | Invitrogen |
| Rosetta(DE3)                  | F <sup>-</sup> <i>ompT hsdSB(r<sub>B</sub><sup>-</sup> m<sub>B</sub><sup>-</sup>) gal dcm lacY1</i> (DE3)                                                                                               | Novagen    |
| R/Hg-EBI                      | Rosetta(DE3) harboring Hg(II) biosensing construct pPmer-CrtEBI with red carotenoid lycopene as pigment signal                                                                                          | This study |
| R/Hg-EBIY                     | Rosetta(DE3) harboring Hg(II) biosensing construct pPmer-CrtEBIY with an orange carotenoid β-carotene as pigment signal                                                                                 | This study |
| R/Hg-EBIY-4                   | Rosetta(DE3) harboring Hg(II) biosensing construct pPmer-CrtEBIY-4 with an orange carotenoid β-carotene as pigment signal                                                                               | This study |
| <b>Plasmids</b>               |                                                                                                                                                                                                         |            |
| pET-21a                       | Amp <sup>R</sup> , T7 promoter, <i>lac</i> operator                                                                                                                                                     | Novagen    |
| pPmer                         | pET-21a derivative containing <i>merR</i> and <i>Pmer</i> divergent promoter region cloned into <i>Bgl</i> III and <i>Xba</i> I sites                                                                   | 1          |
| pET-crtEBI                    | pET-21a derivative containing the lycopene biosynthetic gene cluster (a tricistronic <i>crtEBI</i> unit)                                                                                                | This study |
| pET-crtEBIY                   | pET-21a derivative containing the β-carotene biosynthetic gene cluster <i>crtEBIY</i> (a tricistronic <i>crtEBI</i> unit fused with <i>crtY</i> under the control of independent <i>Pmer</i> promoter ) | This study |
| pPmer-crtEBI                  | pET-crtEBI derivative containing the lycopene biosynthetic module under the control of the Hg(II) sensory module                                                                                        | This study |
| pPmer-crtEBIY                 | pET-crtEBIY derivative containing the β-carotene biosynthetic module under the control of the Hg(II) sensory module                                                                                     | This study |
| pPmer-crtEBIY-4               | pPmer-crtEBIY derivative containing <i>crtE</i> , <i>crtB</i> , <i>crtI</i> , and <i>crtY</i> under the control of independent <i>Pmer</i> promoter                                                     | This study |





TACGCGGCCAGCAGGGTTGGCAGCTGCAGACCCTGCTGCGTGAAGAACAGGGCGCGCTGCCGATCACTCTGTCTGGCAACGCGGATGC  
 GTTCTGGCAGCAGCGTCCGCTGGCATGCAGCGGCCCTGCGTGCCGGCCTGTCCACCCGACCACCGGCTACTCCCTGCCGCTGGCCGTTG  
 CCGTGGCTGATCGTCTGTCTGCGCTGGATGTTTCACCTCCGCTTCCATCCACCACGCGATCACCCACTTCGCTCGTGAACGTTGGCAGCA  
 GCAGGGTCTTCCGATGCTGAACCGTATGCTGTTCTGGCAGGTCGGCTGATAGCCGTTGGCGTGTGATGCAGCGCTTCTATGGTCTG  
 CCGAGGATCTGATCGCGCGCTTCTACGCTGGTAAACTGACCTGACCACCGCCCTGCGTATCCTGAGCGGTAACCGCCGTTCCGGTT  
 CTGCGGCCCTGCAGCGGATCATGACCACCACCGTTAA

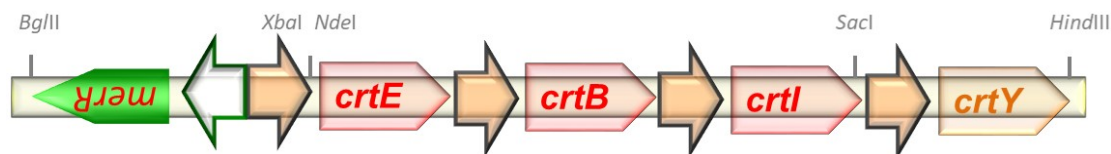

**Fig. S1 The pigment-based Hg(II) biosensing constructs used in this study.**

The lycopene biosynthetic gene cluster is comprised of *crtE* (909 bp), *crtB* (930 bp), and *crtI* (1479 bp). The  $\beta$ -carotene biosynthetic gene cluster is comprised of *crtE* (909 bp), *crtB* (930 bp), *crtI* (1479 bp), and *crtY* (1149 bp). These pigment synthetic genes are initially from *Pantoea ananatis* (GenBank: D90087.2) and are regulated by the metalloregulator MerR.

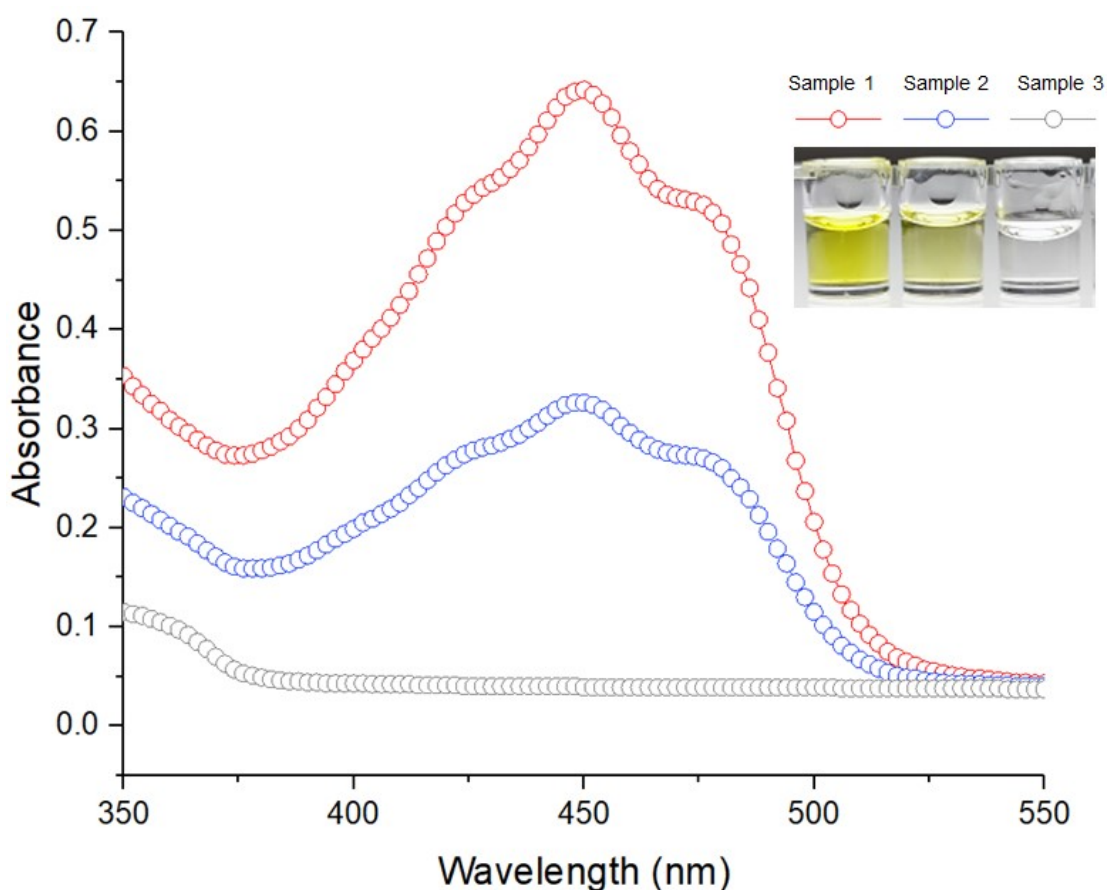

**Fig. S2 The visible absorbance curves of commercial  $\beta$ -carotene.**

The capsule containing  $\beta$ -carotene was purchased from Puritan's Pride (New York, USA). Contents of one capsule were extracted with 2 mL ethanol. The upper ethanol

extract (sample 1), the double dilution (sample 2), and the ethanol extract of the cell pellets of host Rosetta(DE3) (sample 3) were scanned at wavelengths of 350-550 nm at intervals of 2 nm.

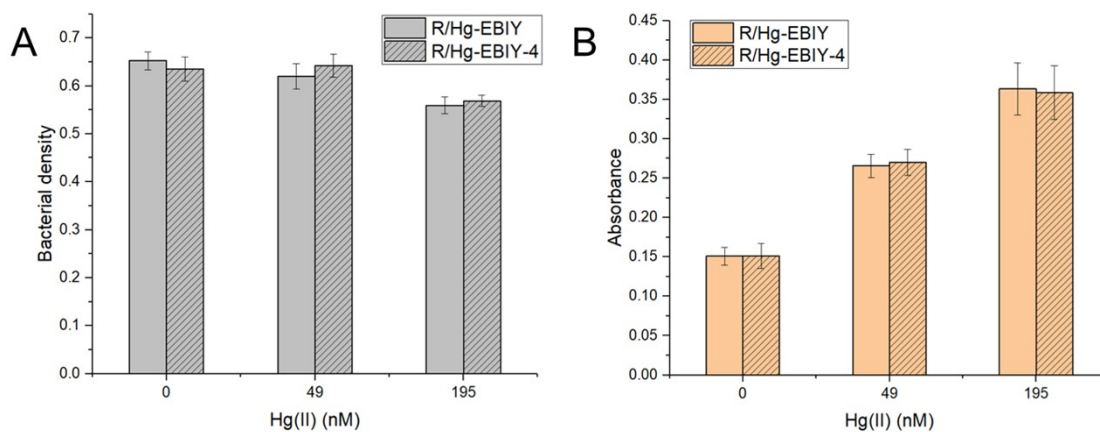

**Fig. S3 Comparison of the response to Hg(II) in two bacterial biosensors.**

(A) Bacterial densities of R/Hg-EBIY and R/Hg-EBIY-4 after exposure to different concentrations of Hg(II). (B) The response intensity of R/Hg-EBIY and R/Hg-EBIY-4.

The values shown are mean  $\pm$  SD ( $n = 3$ ).

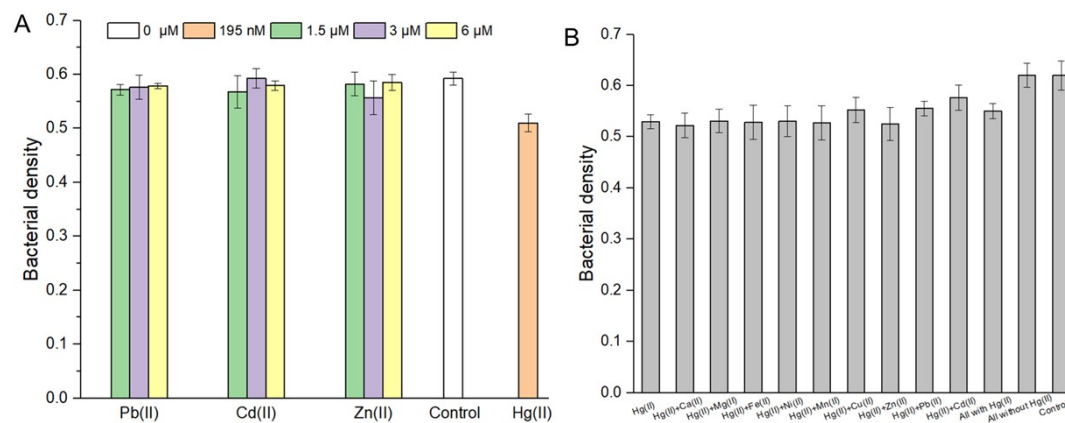

**Fig. S4 Bacterial densities of R/Hg-EBIY exposed to various metal ions after incubation at 37 °C for three hours.**

(A) Bacterial densities after exposure to Pb(II), Cd(II), Zn(II), and Hg(II) at different concentrations. (B) Bacterial densities after exposure to 195 nM Hg(II) in combination with 6  $\mu$ M divalent metal ions. Data shown are mean  $\pm$  SD ( $n = 3$ ).

## References

1. C. Y. Hui, Y. Guo, H. Li, Y. T. Chen and J. Yi, *Frontiers in microbiology*, 2022, **13**, 846524.
